# Supplementary material for: Comparison of the Effect of Native 1,4-Naphthoquinones Plumbagin, Menadione, and Lawsone on Viability, Redox Status, and Mitochondrial Functions of C6 Glioblastoma Cells
Source: MDPI journal article supplement (doi:10.3390/nu11061294), 2019-06-07
Supplement: s1 [file s1]

## SUPPLEMENTARY DATA

### Comparison of the effect of native 1,4-naphthoquinons plumbagin, menadione and lawsone on viability, redox status and mitochondrial functions of C6 glioblastoma cells

Daiva Majiene \*, Jolita Kuseliauskyte, Arturas Stimbirys, Aiste Jekabsone

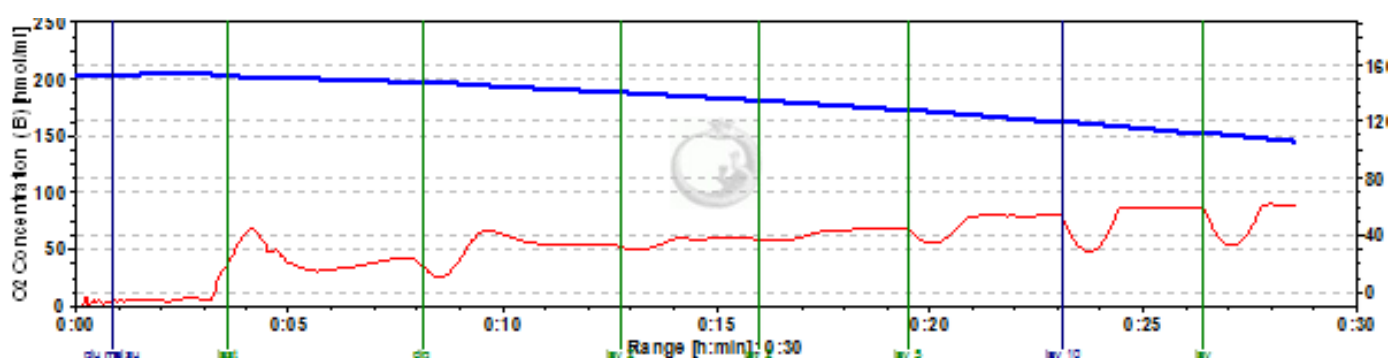

**Figure S 1A. Typical traces of measurement of mitochondrial non-phosphorylating respiration rate in C6 cell.**

At the beginning respiration rate with  $2 \times 10^6$  cells/chamber and in the presence of glutamate + malate (5 mM each) and succinate (12 mM) was recorded. Further additions: 10  $\mu$ M of digitonin, 10  $\mu$ M lawsone, 20  $\mu$ M lawsone, 50  $\mu$ M lawsone, 100  $\mu$ M lawsone. The upper trace (blue) indicates oxygen concentration in a respiratory chamber, the lower (red) one – oxygen consumption rate.

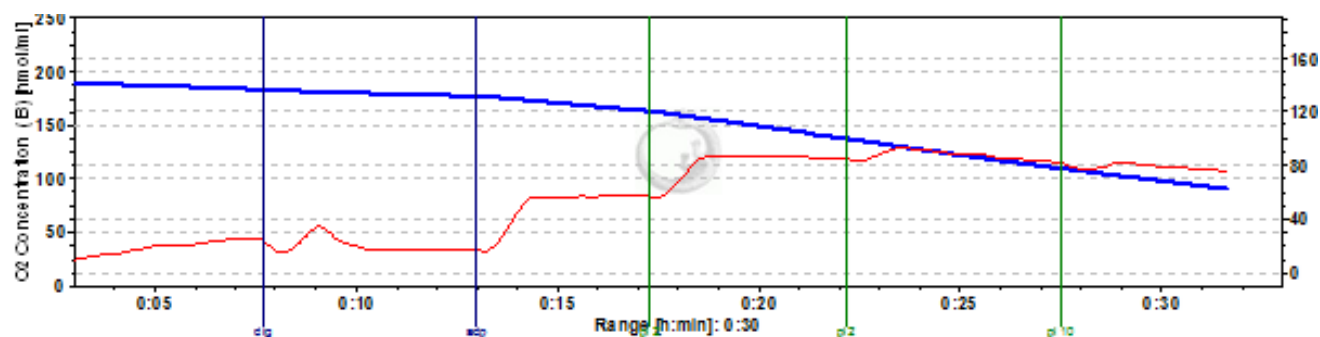

**Figure S 1B. Typical traces of measurement of mitochondrial oxidative phosphorylation rate in C6 cell.**

At the beginning respiration rate with  $2 \times 10^6$  cells/chamber and in the presence of glutamate + malate (5 mM each) and succinate (12 mM) was recorded. Further additions: 10  $\mu$ M of digitonin, 1 mM of ADP; 2  $\mu$ M plumbagin, 2  $\mu$ M plumbagin, 10  $\mu$ M plumbagin . The upper trace (blue) indicates oxygen concentration in a respiratory chamber, the lower (red) one – oxygen consumption rate.
